# Supplementary material for: Pulmonary infectious complications associated with the addition of cryobiopsy to conventional sampling for peripheral pulmonary lesions: a retrospective study
Source: Research Square preprint supplement (doi:10.21203/rs.3.rs-8886538/v1), 2026-02-23
Supplement: Supplementary file 1 [file 76163719b66e42653cee01ea.docx]

**Additional files**

**Pulmonary infectious complications associated with the addition of cryobiopsy to conventional sampling for peripheral pulmonary lesions: a retrospective study**

Tatsuya Imabayashi, Yuji Matsumoto, Keigo Uchimura, Hideaki Furuse, Takaaki Tsuchida

**Additional file 1. Baseline characteristics of patients undergoing combined cryobiopsy and conventional biopsy versus conventional biopsy alone**

| **Variables** | **Combined cryobiopsy group (n = 268)** | **Conventional biopsy group (n = 1,497)** | **P-value** |
| --- | --- | --- | --- |
| Age, years | 67 (53–74) | 69 (60–75) | 0.001 |
| Sex, male | 133 (49.6) | 838 (56.0) | 0.062 |
| Body mass index, kg/m2 | 22.4 (20.0–24.8) | 22.0 (20.2–24.5) | 0.922 |
| Smoking history |  |  | 0.152 |
| Never smoker | 103 (38.4) | 505 (33.7) |  |
| Ex-smoker | 117 (43.7) | 748 (50.0) |  |
| Current smoker | 48 (17.9) | 244 (16.3) |  |
| Smoking index, pack-years | 13.0 (0–33.3) | 20.0 (0–47.0) | 0.003 |
| Chronic obstructive pulmonary disease | 54 (20.1) | 421 (28.1) | 0.007 |
| Interstitial lung disease | 5 (1.9) | 77 (5.1) | 0.017 |
| Diabetes mellitus | 39 (14.6) | 249 (16.6) | 1.000 |
| Receiving corticosteroids or immunosuppressants | 8 (3.0) | 23 (1.5) | 0.124 |
| Receiving anticancer therapy | 20 (7.5) | 209 (14.0) | 0.003 |
| Rebiopsy | 16 (6.0) | 295 (19.7) | < 0.001 |
| WBC, count/μL | 6,000 (4,900–7,825) | 6,200 (5,100–7,600) | 0.835 |
| CRP, mg/dL | 0.07 (0.03–0.29) | 0.11 (0.04–0.38) | 0.008 |
| Albumin, g/dL | 4.3 (4.0–4.5) | 4.2 (3.9–4.4) | < 0.001 |
| Lesion size, mm | 25.6 (17.8–24.5) | 25.6 (17.2–37.5) | 0.345 |
| Lobar location |  |  | 0.063 |
| Right upper lobe/left upper segment | 127 (47.4) | 802 (53.6) |  |
| Others | 141 (52.6) | 695 (46.4) |  |
| Lesion location from the hilum |  |  | 1.000 |
| Central/intermediate | 90 (33.6) | 506 (33.8) |  |
| Peripheral | 178 (66.4) | 991 (66.2) |  |
| LDA on CT | 51 (19.0) | 407 (27.2) | 0.005 |
| Cavity on CT | 3 (1.1) | 119 (7.9) | < 0.001 |
| Obstructive pneumonic consolidation on CT | 5 (1.9) | 71 (4.7) | 0.033 |
| Abnormal bronchoscopic findings | 46 (17.2) | 276 (18.4) | 0.668 |
| Number of cryobiopsy specimens obtained | 1 (1–1) | 0 (0–0) | < 0.001 |
| Guide sheath use | 27 (10.1) | 316 (21.1) | < 0.001 |
| Forceps use | 252 (94.0) | 1354 (90.4) | 0.064 |
| Number of forceps biopsy specimens obtained | 5 (4–6) | 6 (5–7) | < 0.001 |
| Aspiration needle use | 90 (33.6) | 629 (42.0) | 0.010 |
| Brush use | 32 (11.9) | 359 (24.0) | < 0.001 |
| Prophylactic antibiotics | 37 (13.8) | 222 (14.8) | 0.708 |
| Final diagnosis |  |  | 0.167 |
| Malignant | 238 (88.8) | 1243 (83.0) |  |
| Benign | 30 (11.2) | 254 (17.0) |  |
| Pulmonary infectious complications | 14 (5.2) | 56 (3.7) | 0.237 |
| Data are presented as n (%) or as the median (interquartile range).  WBC: white blood cell count, CRP: C-reactive protein, LDA: low-density area, CT: Computed tomography. | | | |

**Additional file 2. Baseline characteristics of patients with and without pulmonary infectious complications among all cryobiopsy cases**

| **Variables** | **Total (N = 502)** | **Infection (n = 21)** | **Non-infection (n = 481)** | **P-value** |
| --- | --- | --- | --- | --- |
| Age, years | 68.5 (57–75) | 65 (50–74) | 69 (57–75) | 0.204 |
| Sex, male | 248 (49.4) | 13 (61.9) | 235 (48.9) | 0.271 |
| Body mass index, kg/m2 | 22.1 (20.2–24.6) | 21.7 (20.1–25.5) | 22.1 (20.2–24.6) | 0.998 |
| Smoking history |  |  |  | 0.050 |
| Never smoker | 208 (41.4) | 4 (19.0) | 204 (42.4) |  |
| Ex-smoker | 213 (42.4) | 11 (52.4) | 202 (42.0) |  |
| Current smoker | 81 (16.1) | 6 (28.6) | 75 (15.6) |  |
| Smoking index, pack-years | 9.0 (0–33.0) | 27.0 (3.75–39.0) | 7.95 (0–33.0) | 0.031 |
| Chronic obstructive pulmonary disease | 97 (19.3) | 4 (19.0) | 93 (19.3) | 1.000 |
| Interstitial lung disease | 9 (1.8) | 1 (4.8) | 8 (1.7) | 0.405 |
| Diabetes mellitus | 70 (13.9) | 3 (14.3) | 67 (13.9) | 1.000 |
| Receiving corticosteroids or immunosuppressants | 14 (2.8) | 0 (0) | 14 (2.9) | 1.000 |
| Receiving anticancer therapy | 25 (5.0) | 5 (23.8) | 20 (4.2) | 0.005 |
| Rebiopsy | 21 (4.2) | 4 (19.0) | 17 (3.5) | 0.009 |
| WBC, count/μL | 5,900 (4,900–7,275) | 7,000 (4,600–10,800) | 5,900 (4,900–7,200) | 0.219 |
| CRP, mg/dL | 0.06 (0.03–0.18) | 0.49 (0.09–2.17) | 0.06 (0.03–0.17) | < 0.001 |
| Albumin, g/dL | 4.3 (4.0–4.5) | 4.2 (3.7–4.3) | 4.3 (4.0–4.5) | 0.066 |
| Lesion size, mm | 23.3 (16.9–32.6) | 33.4 (25.1–57.0) | 22.8 (16.4–31.4) | < 0.001 |
| Lobar location |  |  |  | 0.658 |
| Right upper lobe/left upper segment | 255 (50.8) | 12 (57.1) | 243 (50.5) |  |
| Others | 247 (49.2) | 9 (42.9) | 242 (50.3) |  |
| Lesion location from the hilum |  |  |  | 0.319 |
| Central/intermediate | 139 (27.7) | 8 (38.1) | 131 (27.2) |  |
| Peripheral | 363 (72.3) | 13 (61.9) | 350 (72.8) |  |
| LDA on CT | 65 (12.9) | 11 (52.4) | 54 (11.2) | < 0.001 |
| Cavity on CT | 8 (1.6) | 1 (4.8) | 7 (1.5) | 0.291 |
| Obstructive pneumonic consolidation on CT | 8 (1.6) | 1 (4.8) | 7 (1.5) | 0.291 |
| Abnormal bronchoscopic findings | 59 (11.8) | 10 (47.6) | 49 (10.2) | < 0.001 |
| Cryoprobe type |  |  |  | 0.074 |
| Reusable probe | 284 (56.6) | 16 (76.2) | 268 (55.7) |  |
| Single-use probe | 218 (43.4) | 5 (23.8) | 213 (44.3) |  |
| Number of cryobiopsy specimens obtained | 2 (1–3) | 1 (1–3) | 2 (1–3) | 0.580 |
| Combination with conventional biopsy |  |  |  | 0.266 |
| Cryobiopsy-alone | 234 (46.6) | 7 (33.3) | 227 (47.2) |  |
| Combination | 268 (53.4) | 14 (66.7) | 254 (52.8) |  |
| Guide sheath use | 27 (5.4) | 1 (4.8) | 26 (5.4) | 1.000 |
| Forceps use | 252 (50.2) | 14 (66.7) | 238 (49.5) | 0.180 |
| Aspiration needle use | 90 (17.9) | 3 (14.3) | 87 (18.1) | 1.000 |
| Brush use | 32 (6.4) | 1 (4.8) | 31 (6.4) | 1.000 |
| Prophylactic antibiotics | 51 (10.2) | 3 (14.3) | 48 (10.0) | 0.462 |
| Final diagnosis |  |  |  | 0.721 |
| Malignant | 445 (88.6) | 18 (85.7) | 427 (88.8) |  |
| Benign | 57 (11.4) | 3 (14.3) | 54 (11.2) |  |
| Data are presented as n (%) or as the median (interquartile range).  WBC: white blood cell count, CRP: C-reactive protein, LDA: low-density area, CT: Computed tomography. | | | | |

**Additional file 3. Univariable logistic regression analysis of risk factors for pulmonary infectious complications following cryobiopsy (N = 502)**

| **Variables** | **Incidence** | **Unadjusted OR (95% CI)** | **P-value** |
| --- | --- | --- | --- |
| Age (> 75 years) | 2.9% vs. 4.5% | 0.63 (0.18–2.17) | 0.461 |
| Sex (male) | 5.2% vs. 3.1% | 1.70 (0.69–4.18) | 0.247 |
| Body mass index (> 25 kg/m2) | 5.6% vs. 3.8% | 1.50 (0.57–3.98) | 0.410 |
| Smoking history (current or ex-smoker) | 5.8% vs. 1.9% | 3.13 (1.04–9.44) | 0.043 |
| Interstitial lung disease | 11.1% vs. 4.1% | 2.96 (0.35–24.80) | 0.318 |
| Chronic obstructive pulmonary disease | 4.1% vs. 4.2% | 0.98 (0.32–2.99) | 0.974 |
| Diabetes mellitus | 4.3% vs. 4.2% | 1.03 (0.30–3.59) | 0.963 |
| Receiving anticancer therapy | 17.2% vs. 3.4% | 5.95 (2.01–17.60) | 0.013 |
| Rebiopsy | 19.0% vs. 3.5% | 6.42 (1.95–21.20) | 0.002 |
| WBC (> 10,700 count/μL) | 23.3% vs. 3.0% | 9.96 (3.67–27.00) | < 0.001 |
| CRP (> 0.48 mg/dL) | 15.6% vs. 2.1% | 8.49 (3.44–20.90) | < 0.001 |
| Albumin (< 3.8 g/dL) | 10.5% vs. 3.4% | 3.37 (1.25–9.08) | 0.016 |
| Lesion size (> 23 mm) | 7.4% vs. 0.8% | 9.62 (2.22–41.70) | 0.003 |
| Lobar location (RUL or LUS) | 4.7% vs. 3.6% | 1.31 (0.54–3.16) | 0.553 |
| Lesion location from the hilum (central or intermediate) | 5.8% vs. 3.6% | 1.64 (0.67–4.06) | 0.281 |
| LDA on CT | 16.9% vs. 2.3% | 8.70 (3.53–21.40) | < 0.001 |
| Cavity on CT | 12.5% vs. 4.0% | 3.39 (0.40–28.90) | 0.265 |
| Obstructive pneumonic consolidation on CT | 12.5% vs. 4.0% | 3.39 (0.40–28.90) | 0.265 |
| Abnormal bronchoscopic findings | 16.9% vs. 2.5% | 8.01 (3.24–19.80) | < 0.001 |
| Number of cryobiopsy specimens obtained (> 3) | 4.9% vs. 3.9% | 1.26 (0.50–3.18) | 0.631 |
| Combination with conventional biopsy | 5.2% vs. 3.0% | 1.79 (0.71–4.51) | 0.218 |
| Guide sheath use | 3.7% vs. 4.2% | 0.88 (0.11–6.78) | 0.898 |
| Forceps use | 5.6% vs. 2.8% | 2.04 (0.81–5.15) | 0.130 |
| Aspiration needle use | 3.3% vs. 4.4% | 0.76 (0.22–2.62) | 0.658 |
| Brush use | 3.1% vs. 4.3% | 0.73 (0.09–5.59) | 0.758 |
| Prophylactic antibiotics | 5.9% vs. 4.0% | 1.50 (0.43–5.29) | 0.525 |
| Final diagnosis (malignancy) | 4.0% vs. 5.3% | 0.76 (0.22–2.66) | 0.666 |
| OR: odds ratio, CI: confidence interval, WBC: white blood cell count, CRP: C-reactive protein, RUL: right upper lobe, LUS: left upper segment, LDA: low-density area, CT: computed tomography. | | | |

**Additional file 4. Firth penalized multivariable logistic regression analysis of risk factors for pulmonary infectious complications following cryobiopsy**

| **Variables** | **Adjusted OR** | **95% CI** | **P-value** |
| --- | --- | --- | --- |
| LDA on CT | 5.35 | 1.37–19.15 | 0.016 |
| Abnormal bronchoscopic findings | 3.68 | 0.87–14.43 | 0.077 |
| Lesion size (per 1-mm increase) | 1.01 | 0.98–1.03 | 0.655 |
| Prophylactic antibiotics* | 0.21 | 0.04–0.81 | 0.024 |
| Rebiopsy | 1.93 | 0.45–7.00 | 0.357 |
| OR: odds ratio, CI: confidence interval, LDA: low-density area, CT: computed tomography.  * Prophylactic antibiotics were included as a sensitivity analysis to assess the robustness of the associations and were not considered a primary exposure of interest. | | | |
